# Supplementary material
Source: HighWire-hosted journal article supplement (http://dmd.aspetjournals.org/highwire/filestream/65919/field_highwire_adjunct_files/2/DMD25759_Supplemental_Fig_3.pdf)

Supplemental Figure 3. 24OHChol-3-sulfate bound in the SULT2A1 monomer with the 24-OH oriented towards the PAP molecule. The second two orientations with the lowest BFE are shown. PAP is shown in yellow. 24OHChol is shown in magenta and the sulfonate is in cyan.

#2

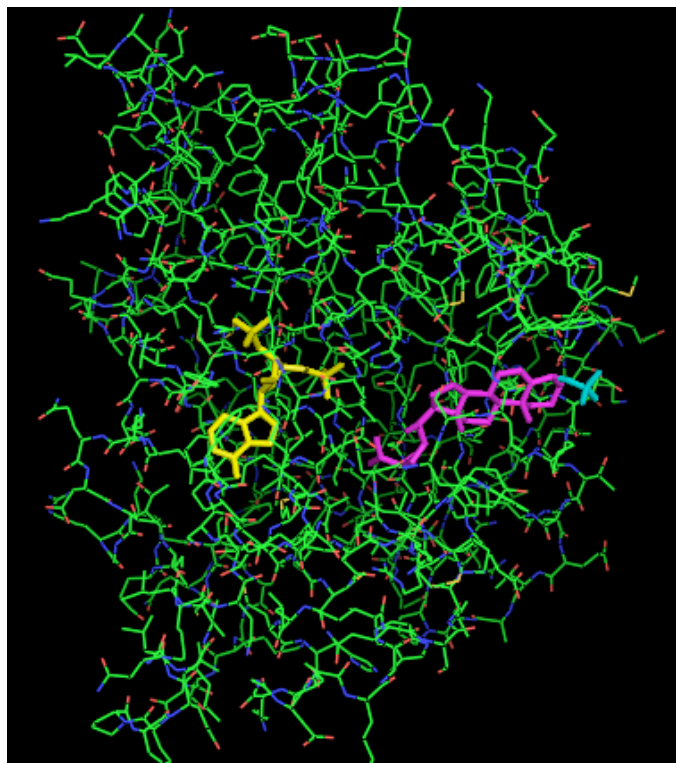

#3

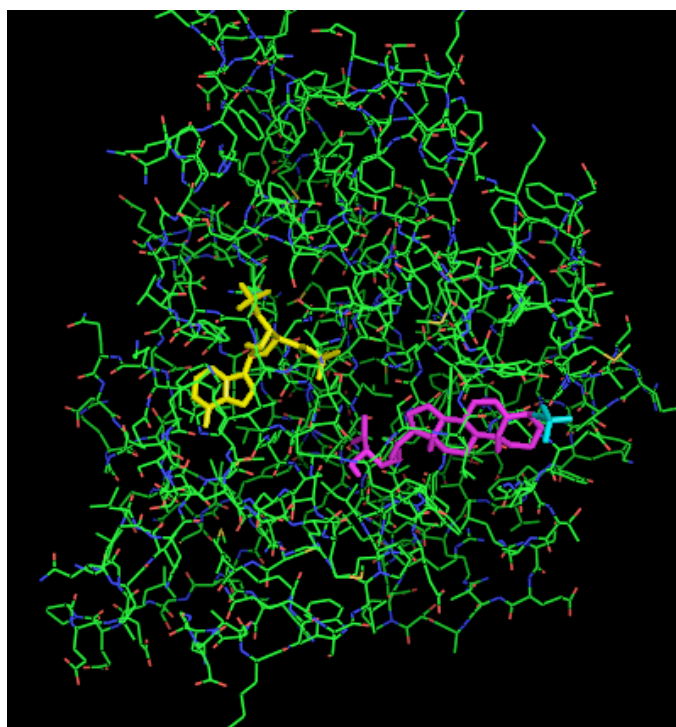

Supplement: DMD25759_Supplemental_Fig_3.pdf [file DMD25759_Supplemental_Fig_3.pdf]
